# Supplementary material for: A palladium–bisoxazoline supported catalyst for selective synthesis of aryl esters and aryl amides via carbonylative coupling reactions
Source: Royal Society of Chemistry journal article supplement (doi:10.1039/c6ra15506e), 2016-01-01
Supplement: c6ra15506e1.pdf [file c6ra15506e1.pdf]

## Palladium-Bisoxazoline Supported Catalyst for Selective Synthesis of Aryl Esters and Aryl Amides via Carbonylative Coupling Reactions

Mansur B. Ibrahim<sup>a</sup>, Rami Suleiman<sup>b</sup>, Mohammed Fettouhi<sup>a</sup> and Bassam El Ali<sup>a\*</sup>

<sup>a</sup> Chemistry Department, King Fahd University of Petroleum & Minerals, Dhahran 31261, Saudi Arabia

<sup>b</sup> Center of Research Excellence in Corrosion, King Fahd University of Petroleum & Minerals,  
Dhahran 31261, Saudi Arabia

### Supplementary information

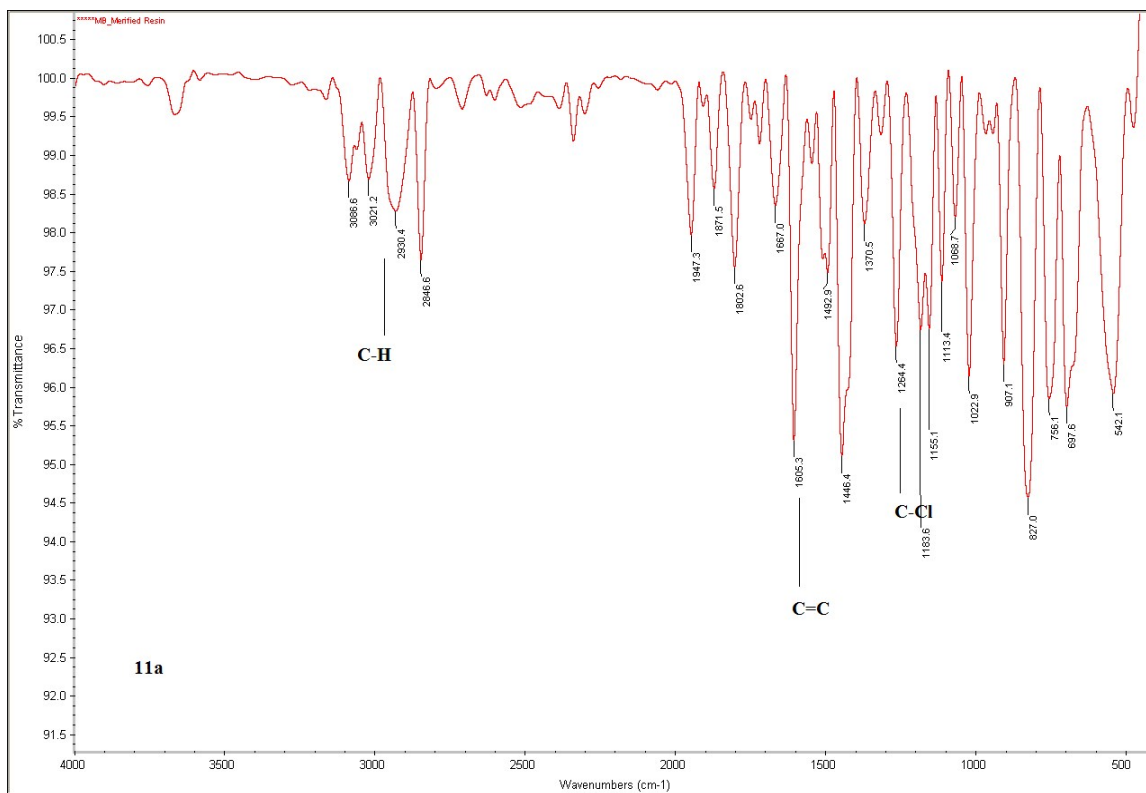

Figure S1. FT-IR Spectrum of Unmodified Merifield's Resin

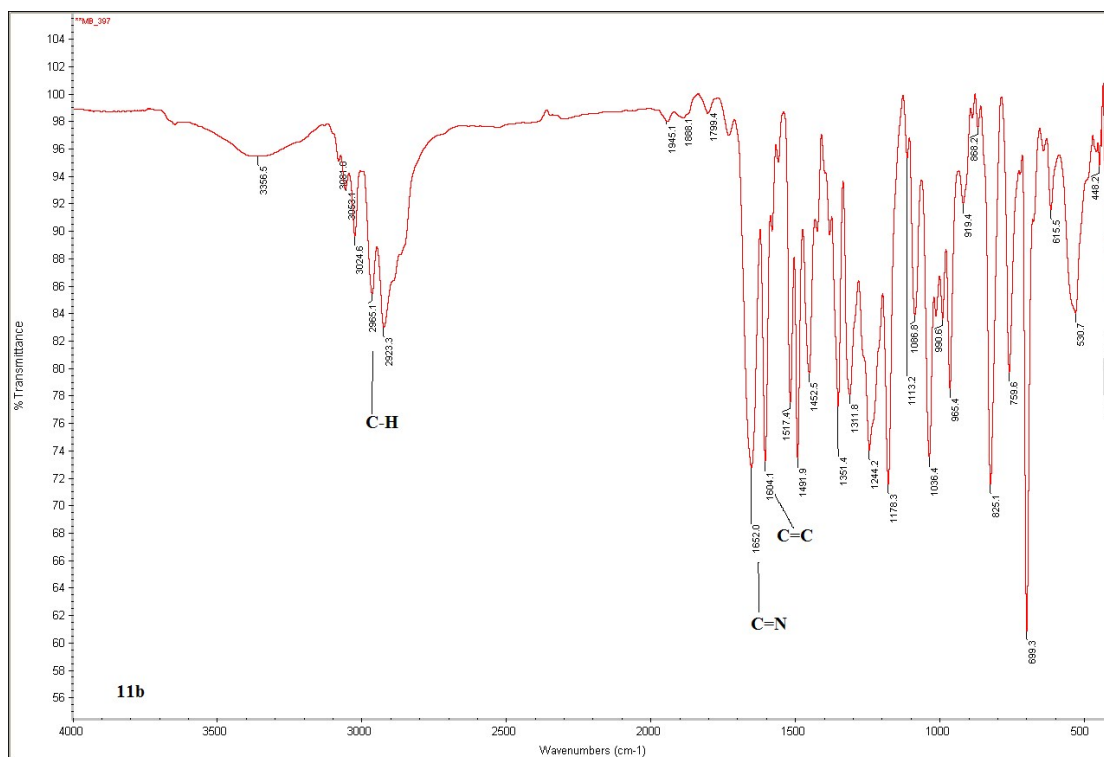

**Figure S2.** FT-IR Spectrum of Merifield's Resin Supported BOX Ligand (BOX-M).

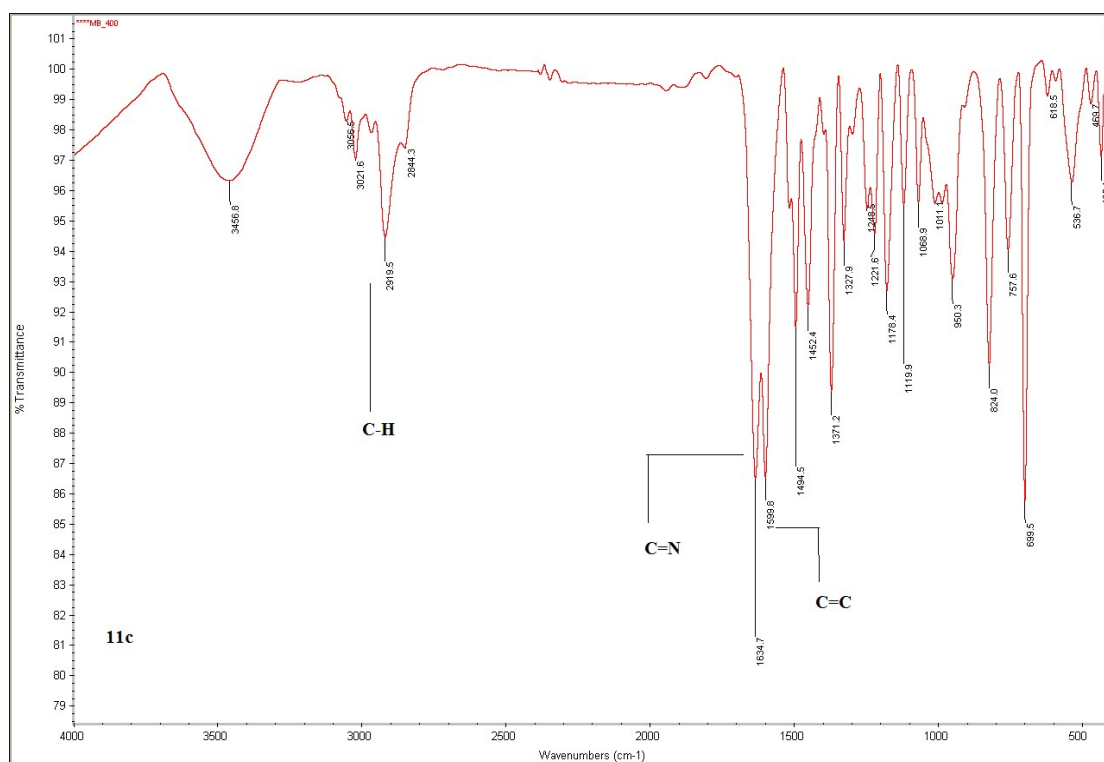

**Figure S3.** FT-IR Spectra of Merifield's Resin Supported Pd-BOX Catalyst (Pd-BOX-M).

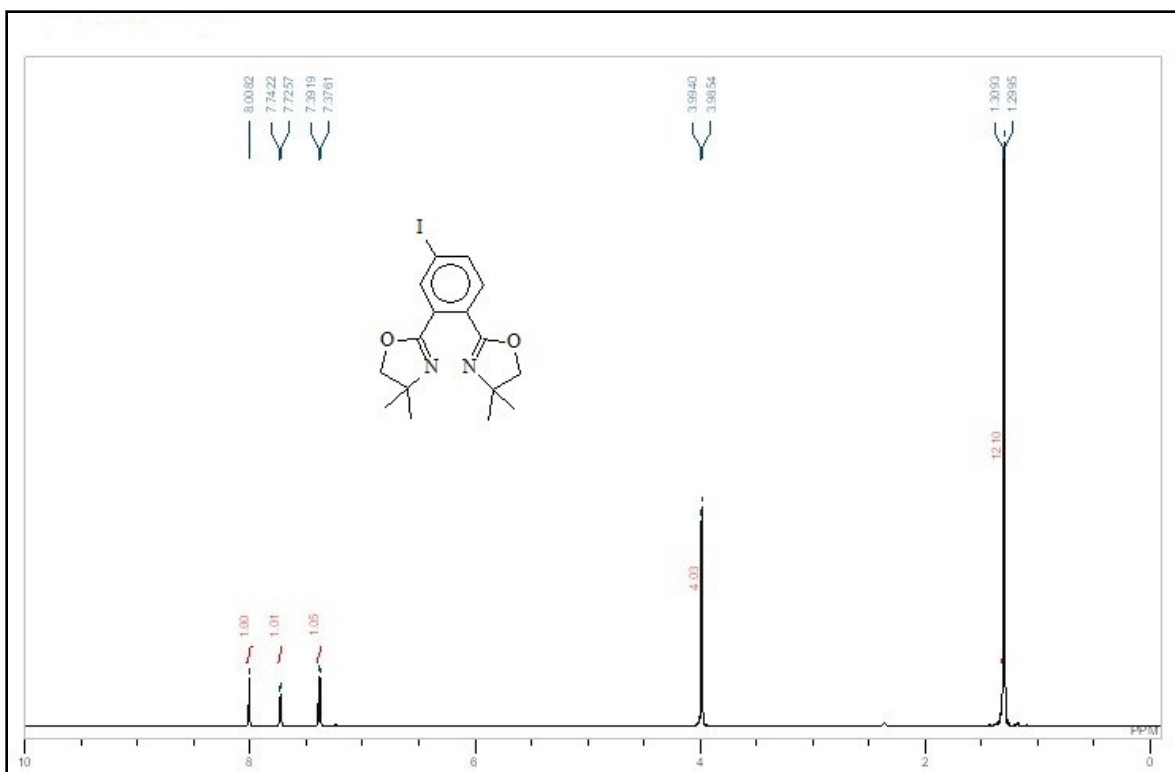

Figure S4. <sup>1</sup>H NMR Spectrum of BOX-I

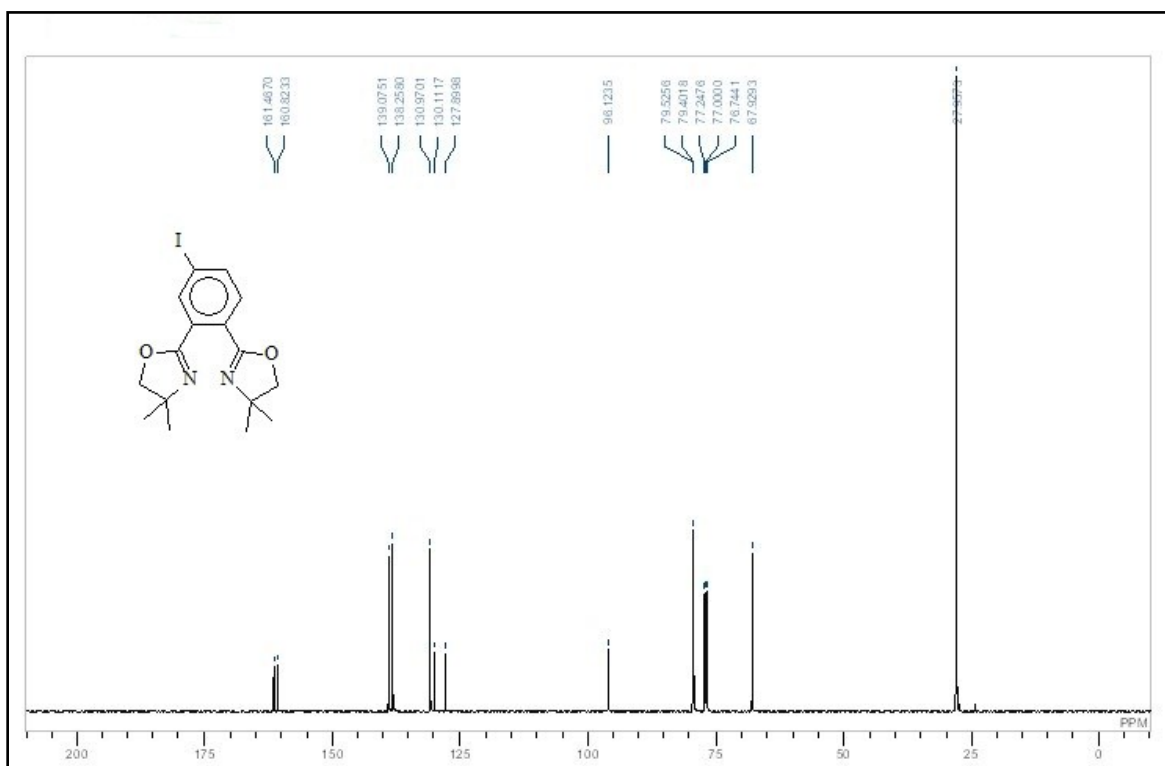

Figure S5. <sup>13</sup>C NMR Spectrum of BOX-I

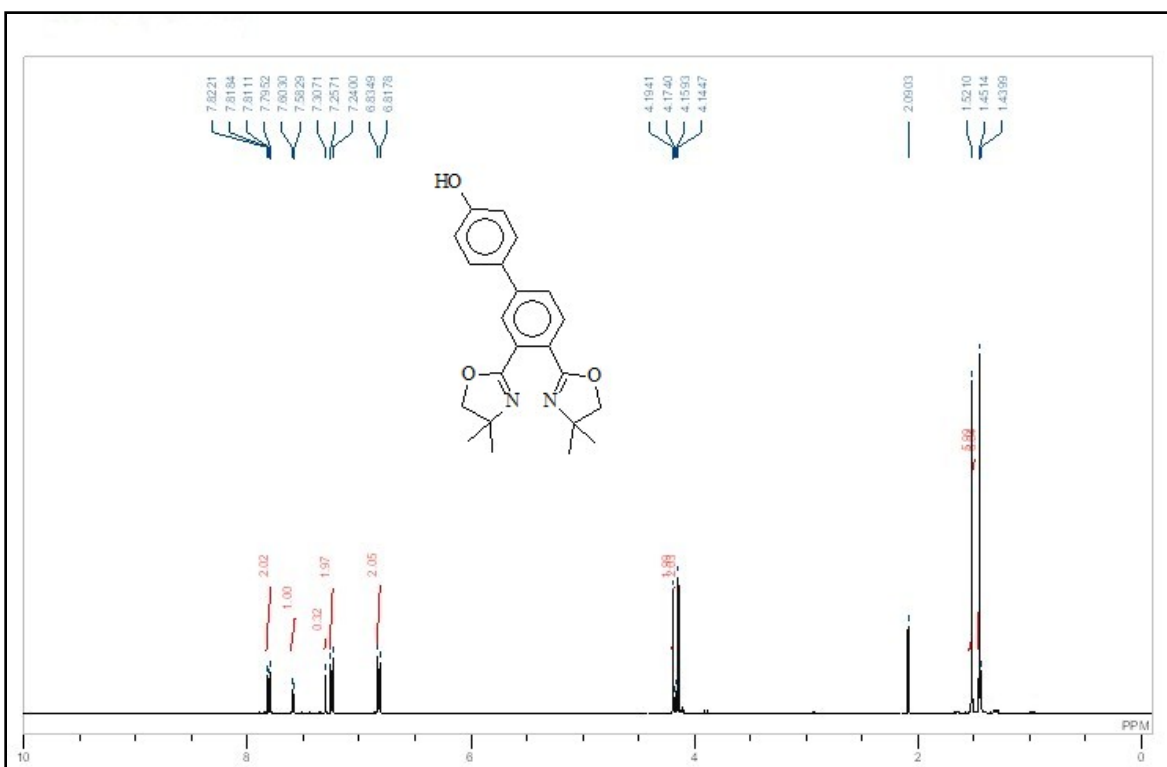

**Figure S6.** <sup>1</sup>H NMR Spectrum of BOX-OH

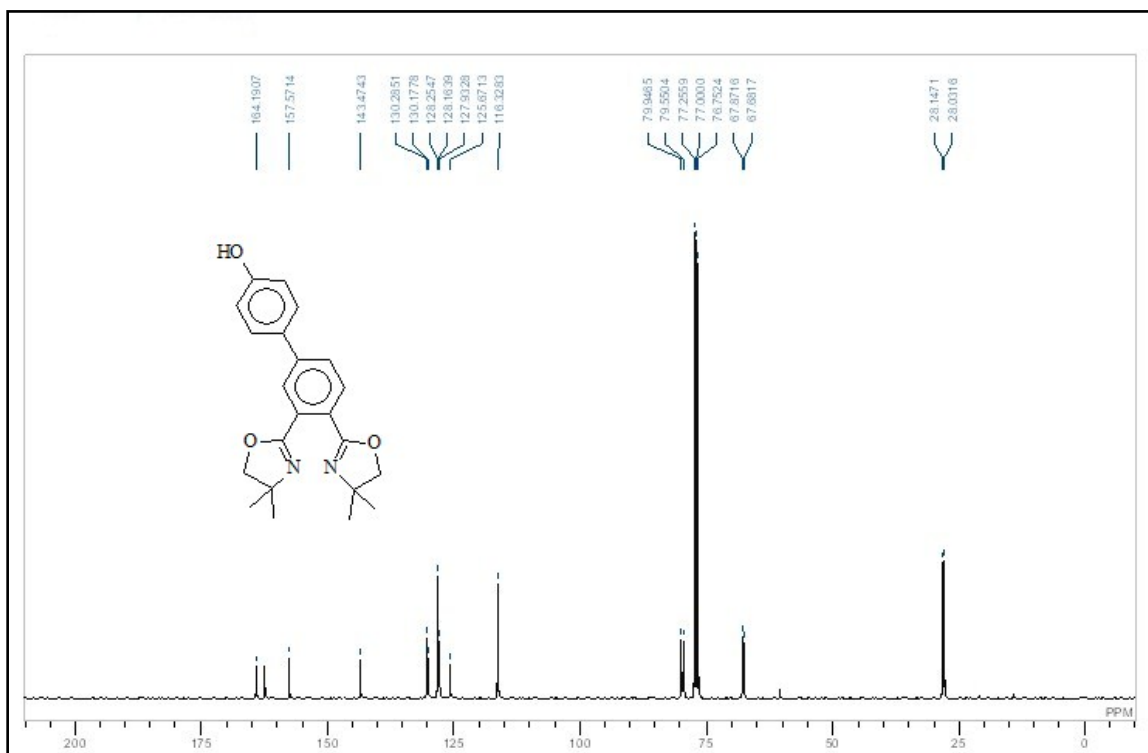

**Figure S7.** <sup>13</sup>C NMR Spectrum of BOX-OH

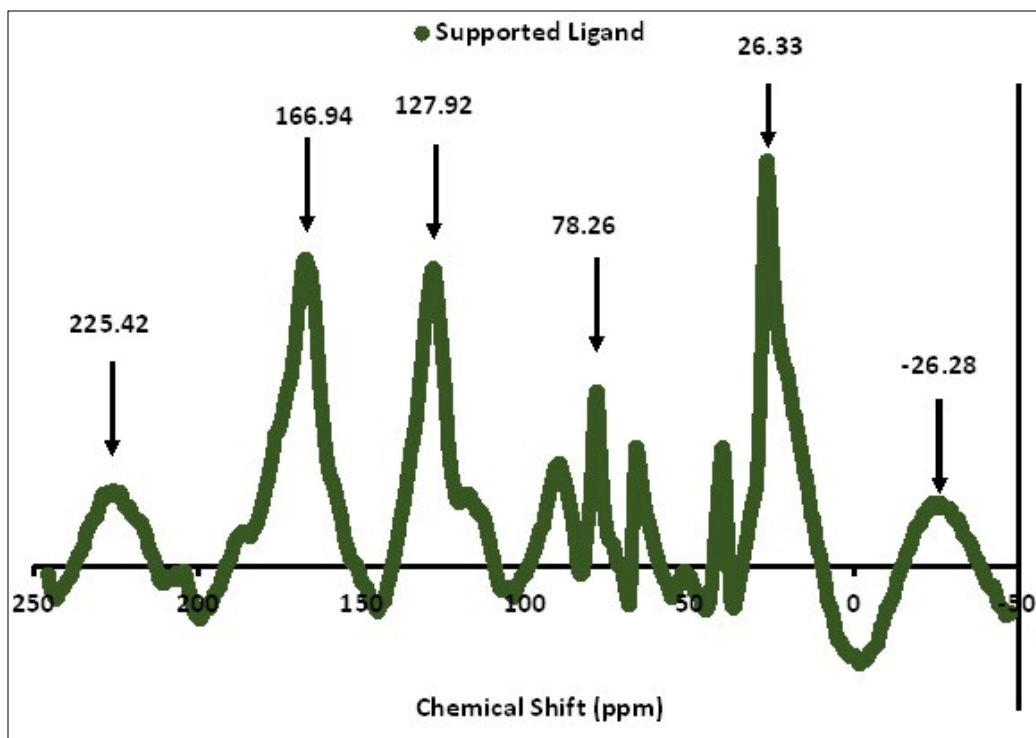

Figure S8. CP-MAS  $^{13}\text{C}$  NMR spectrum of Merrifield's resin supported BOX ligand (BOX-M).

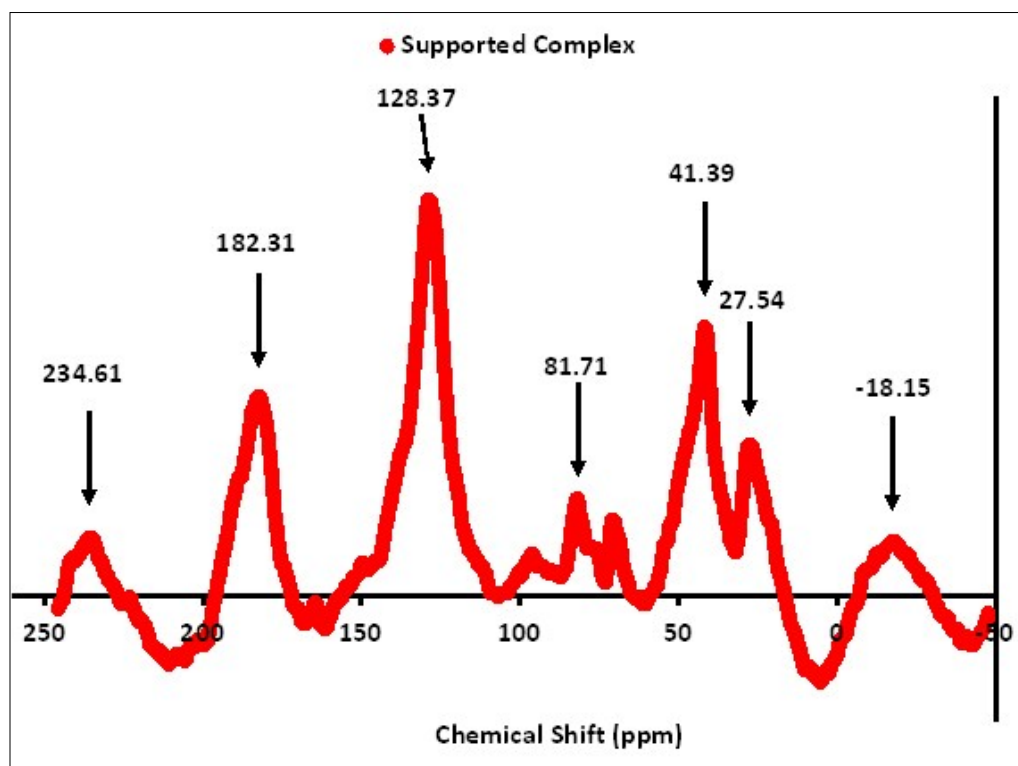

Figure S9. CP-MAS  $^{13}\text{C}$  NMR spectrum of Merrifield's resin supported Pd-BOX catalyst (Pd-BOX-M).

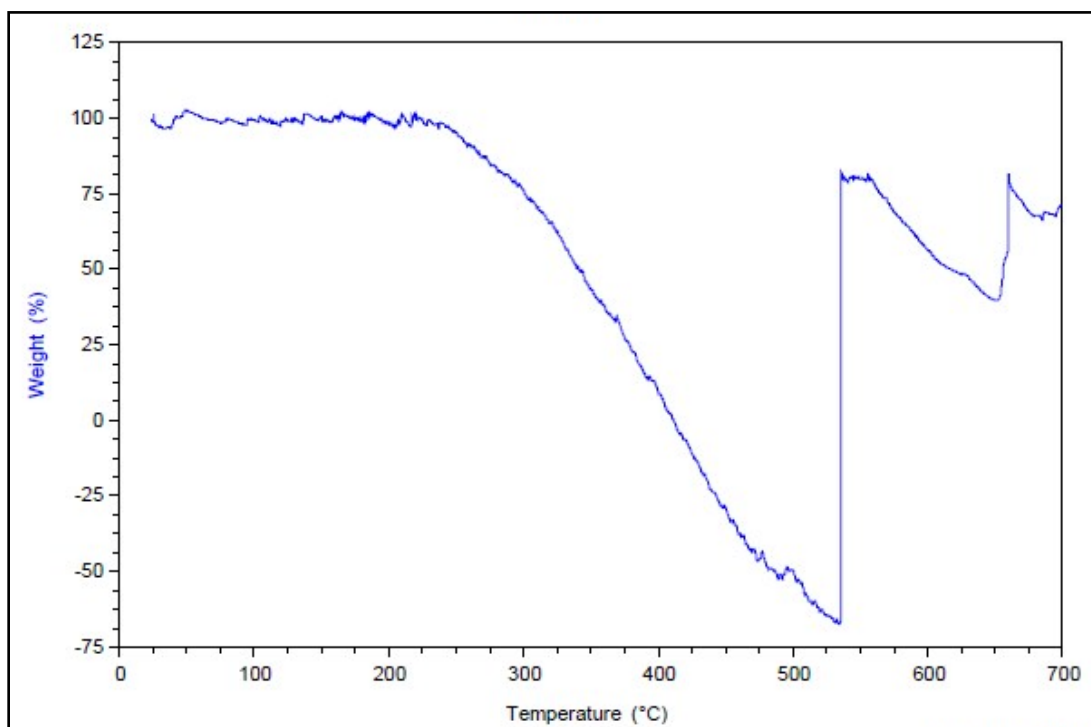

**Figure S10.** TGA Spectrum of Merrifield's resin support.

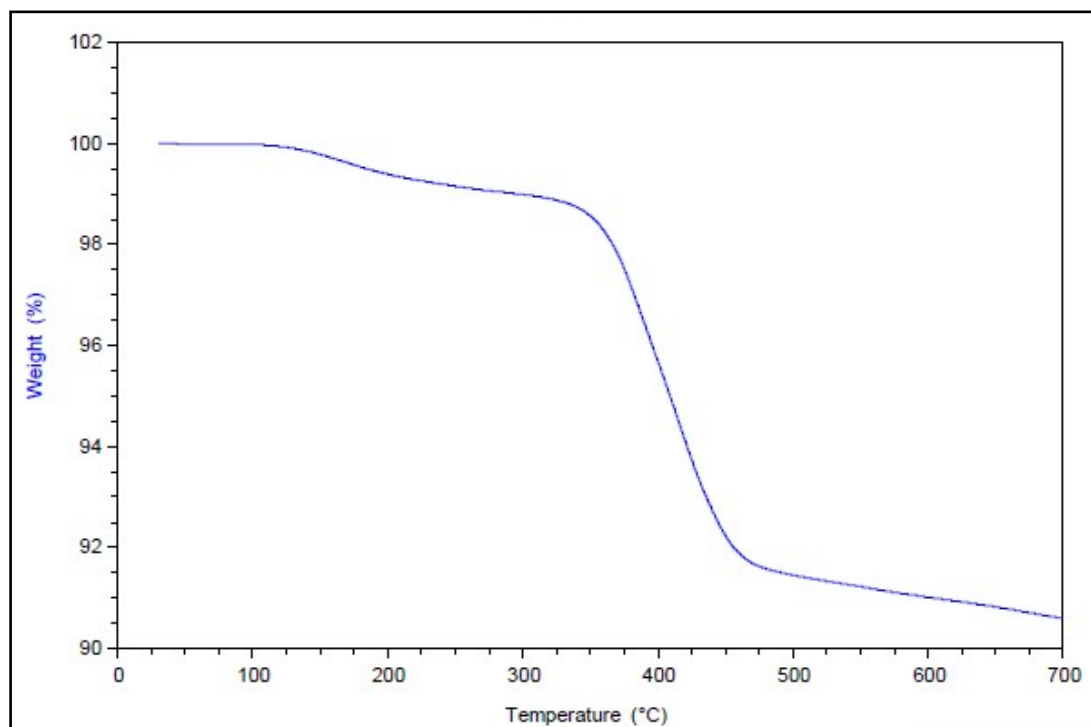

**Figure S11.** TGA plot of Merrifield's resin supported BOX ligand (BOX-M).

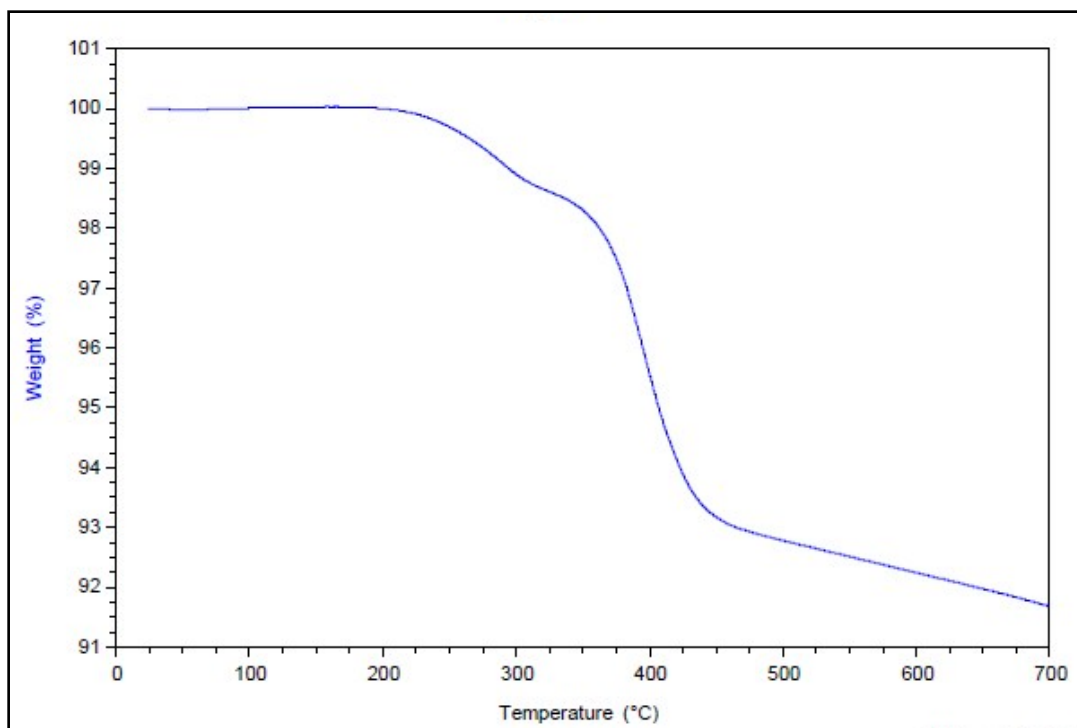

**Figure S12.** TGA plot of Merrifield's resin supported Pd-BOX catalyst (Pd-BOX-M).

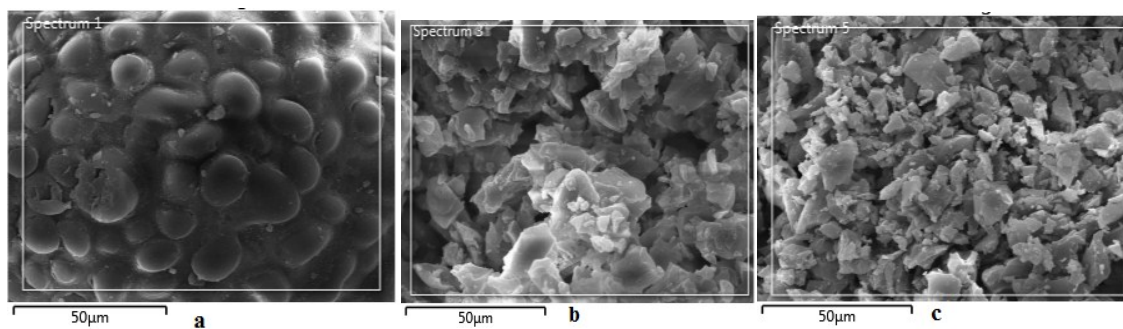

**Figure S13.** Scanning Electron Micrograph of (a) Merrifield's Resin (b) Merrifield's Resin Supported BOX Ligand (c) Merrifield's Resin Supported Pd-BOX Catalyst.
